# Supplementary material
Source: PubMed Central journal article supplement (PMC8456156)
Supplement: mmc1.pdf [file mmc1.pdf]

## Supplemental Data

### Regulatory variants in *TCF7L2* are associated with thoracic aortic aneurysm

Tanmoy Roychowdhury, Haocheng Lu, Whitney E. Hornsby, Bradley Crone, Gao T. Wang, Dong-chuan Guo, Anoop K. Sendamarai, Poornima Devineni, Maoxuan Lin, Wei Zhou, Sarah E. Graham, Brooke N. Wolford, Ida Surakka, Zhenguo Wang, Lin Chang, Jifeng Zhang, Michael Mathis, Chad M. Brummett, Tori L. Melendez, Michael J. Shea, Karen Meekyong Kim, G. Michael Deeb, Himanshu J. Patel, Jonathan Eliason, Kim A. Eagle, Bo Yang, Santhi K. Ganesh, Ben Brumpton, Bjørn Olav Åsvold, Anne Heidi Skogholt, Kristian Hveem, VA Million Veteran Program, Saiju Pyarajan, Derek Klarin, Philip S. Tsao, Scott M. Damrauer, Suzanne M. Leal, Dianna M. Milewicz, Y. Eugene Chen, Minerva T. Garcia-Barrio, and Cristen J. Willer

## Supplementary Information

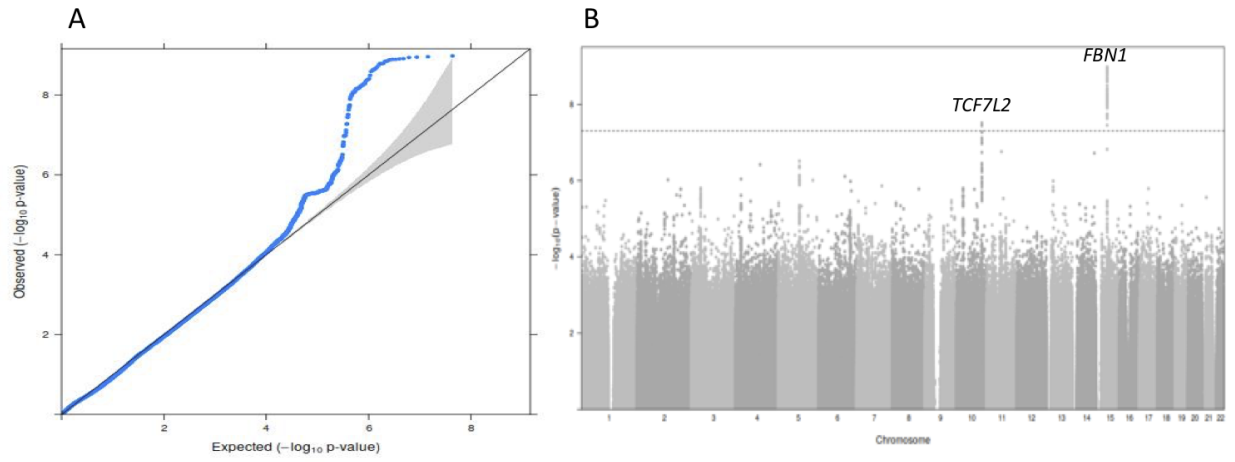

**Figure S1: GWAS of TAA in CHIP/MGI. A) QQ plot. B) Manhattan plot.**

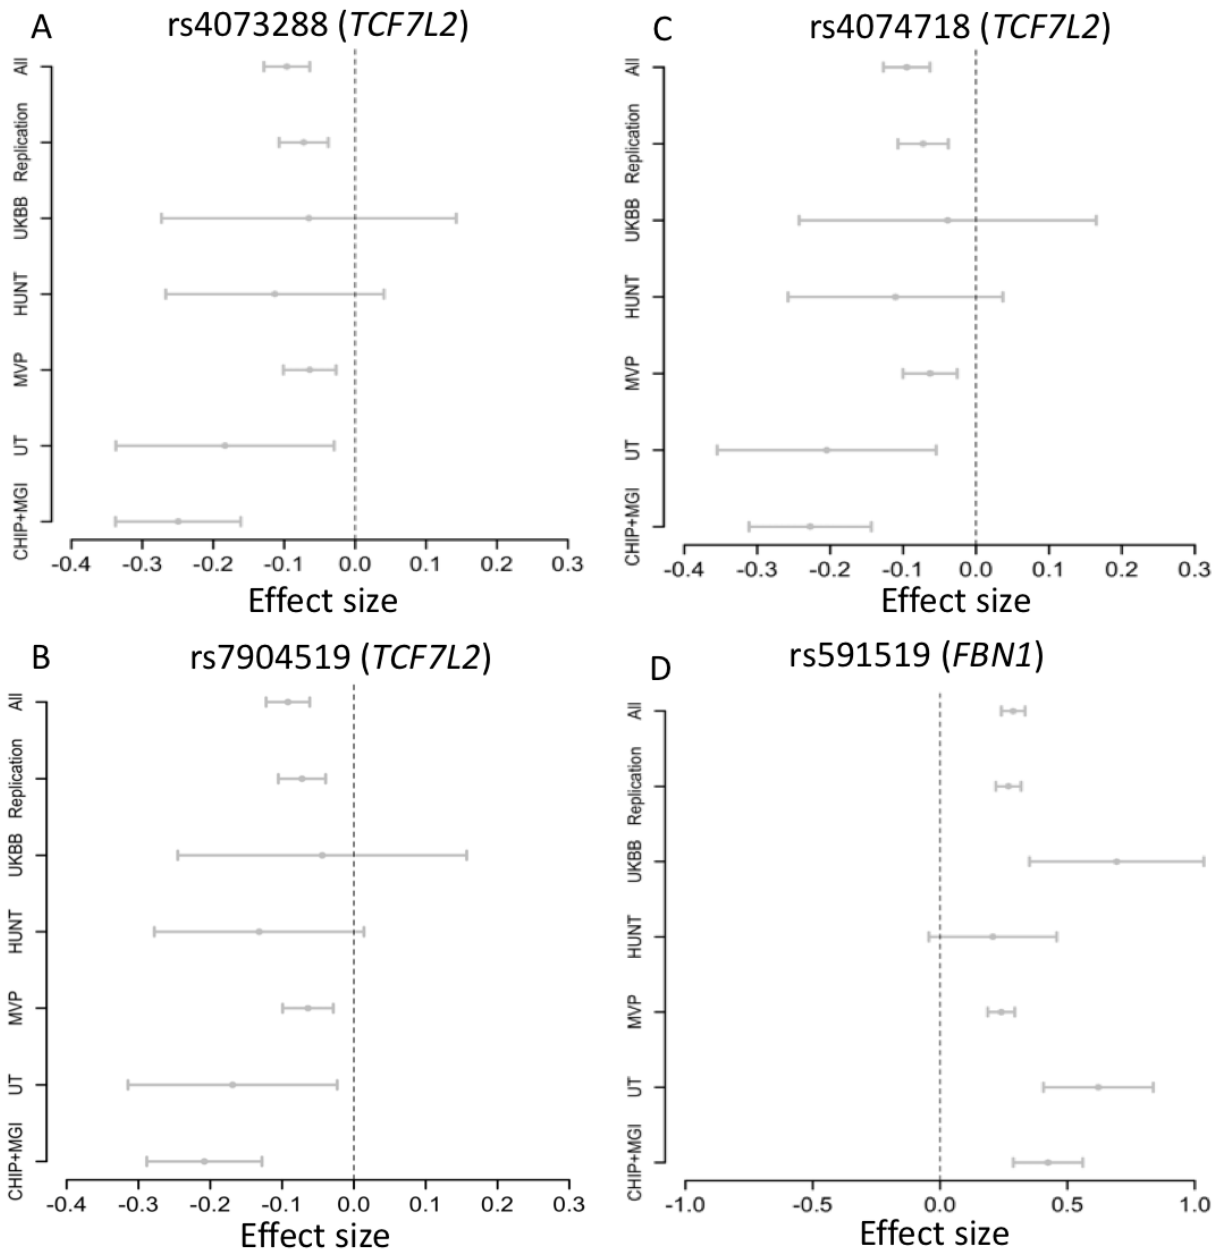

**Figure S2: Effect sizes in discovery and replication cohorts.** Effect size estimation for 3 variants in *TCF7L2* locus (A-C) and *FBN1* index variant (D) in individual cohorts, replication (UT+MVP+HUNT+UKBB), All (CHIP+MGI+Replication).

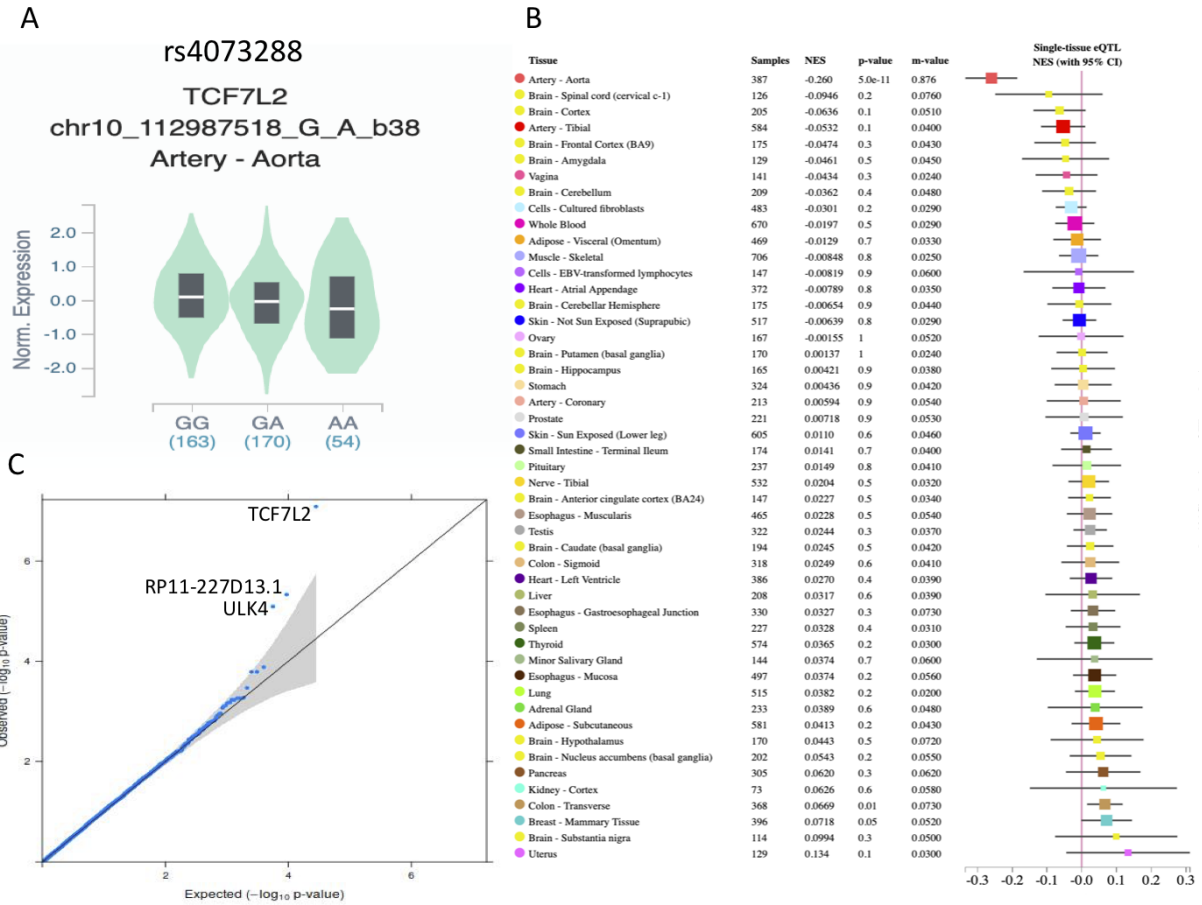

**Figure S3: eQTL. A)** rs4073288 is an aortic eQTL of *TCF7L2* from GTEx V8. TAA risk allele G is associated with higher expression of gene. **B)** This eQTL is only significant in aorta in GTEx V8. **C)** QQ plot of TWAS using SPrediXcan.

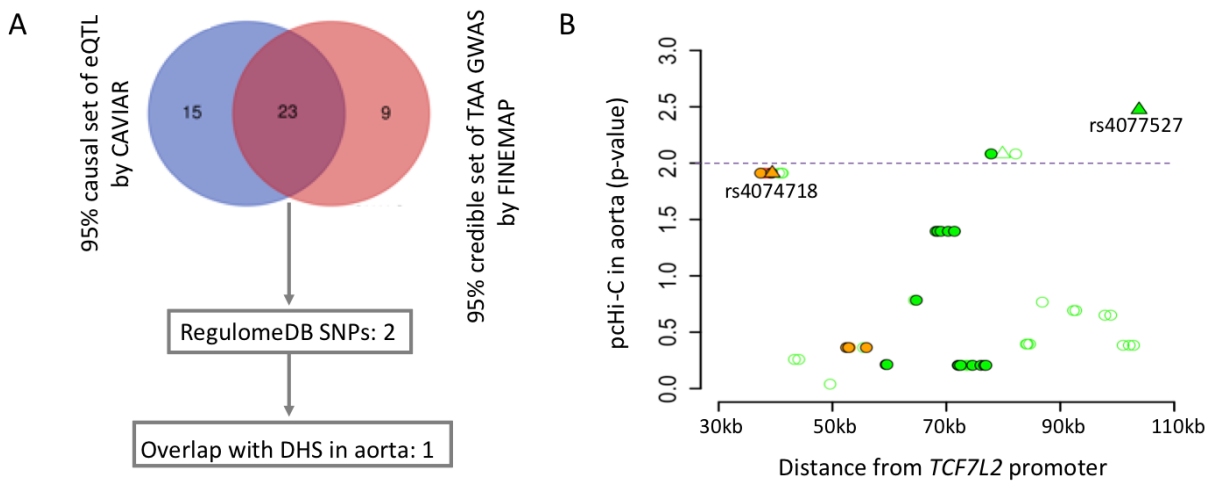

**Figure S4: Fine-mapping of *TCF7L2* loci.** **A)** 23 variants were found to be common between the credible sets of TAA GWAS and eQTL (rs4073980, rs4074720, rs4074718, rs10885402, rs6585197, rs6585199, rs6585200, rs6585201, rs7904519, rs7918599, rs10885406, rs11196190, rs7899529, rs11196191, rs10787472, rs10787473, rs12258200, rs11196193, rs4309084, rs4128598, rs4128597, rs7907610, rs4077527) **B)** Promoter capture Hi-C  $-\log_{10}(\text{p-values})$  of variants that are in LD  $> 0.4$  with TAA index variant rs4073288. Solid shapes are 23 variants mentioned in A. Triangles represent variants prioritized by regulomeDB. The dotted line is the significance threshold as suggested by Jung et al. [PMID: 31501517].

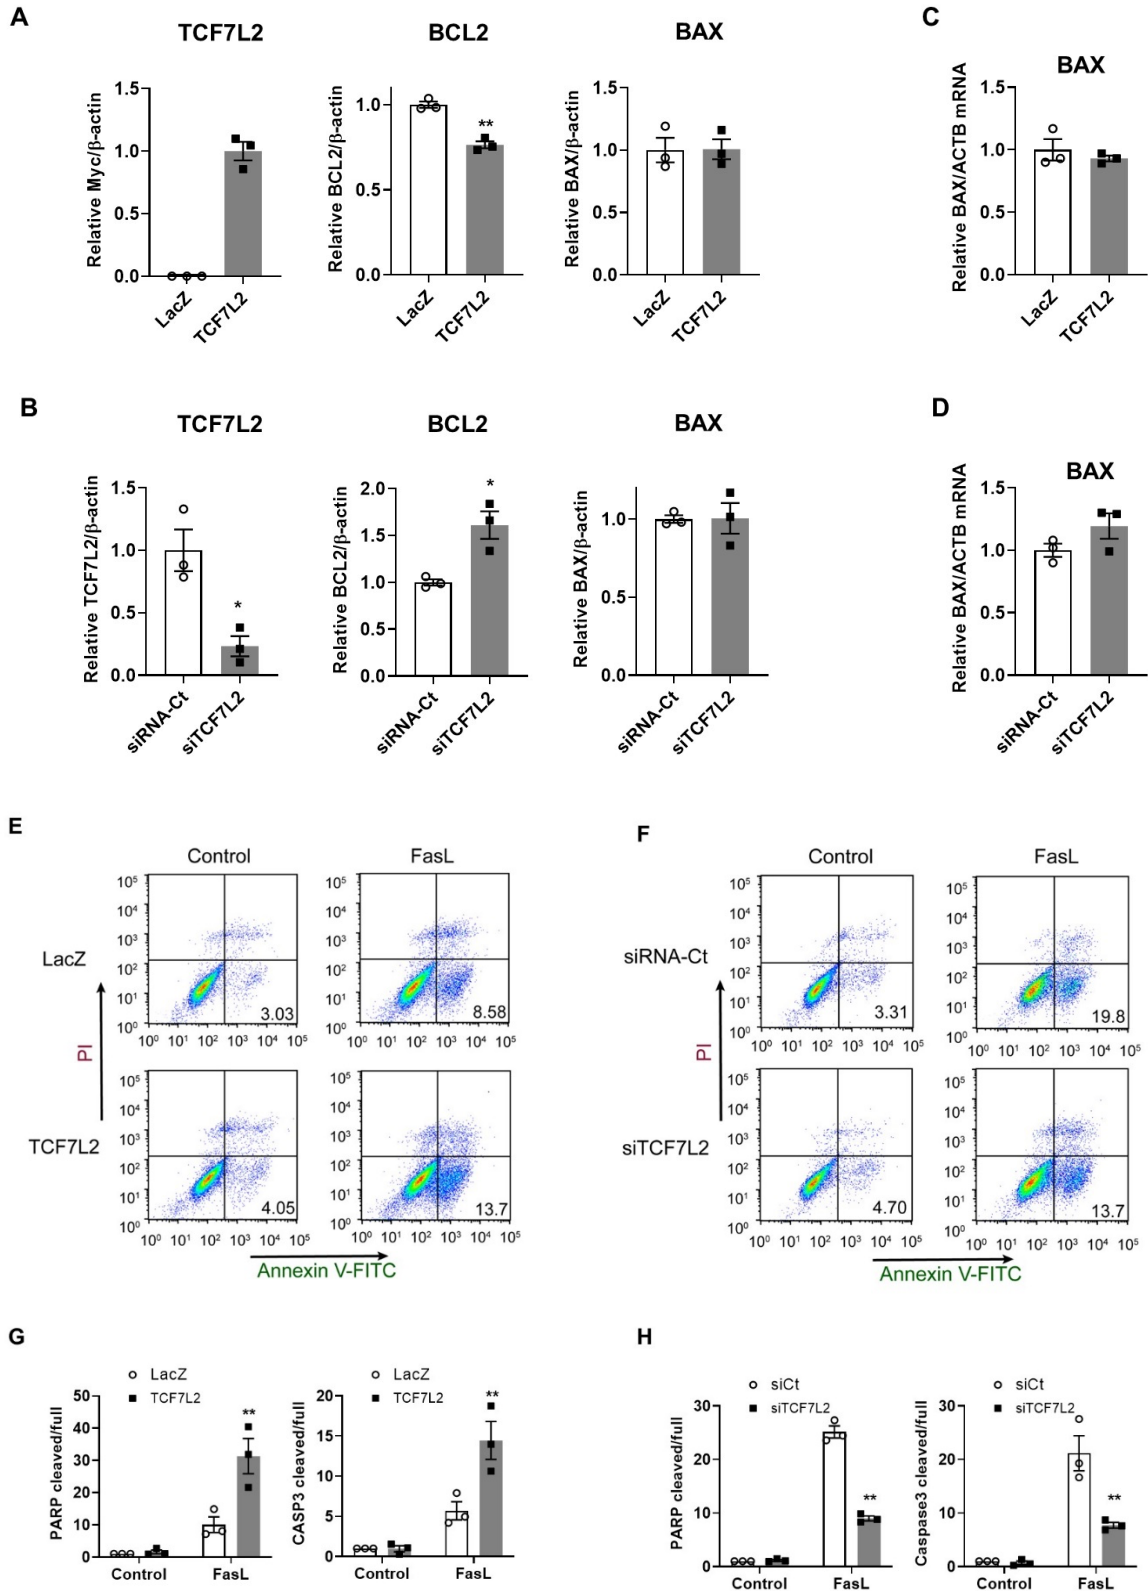

**Figure S5. *TCF7L2* expression is associated with vascular smooth muscle cell apoptosis *in vitro*:** A and B, densitometry of 3 independent Western blots as in Figure 3 A and B. **A)** Overexpression of *TCF7L2* showing significant downregulation of *BCL2*, P=0.0011. Densitometry for Myc-*TCF7L2* shows reproducibility among the three independent experiments. **B)** Knockdown of *TCF7L2* (*TCF7L2*, P=0.0145) showing significant upregulation of *BCL2*, P=0.0154. **C)** upregulation of *TCF7L2* or **D)** siRNA-mediated knockdown of *TCF7L2* does not change expression of *BAX* mRNA. Representative graphs of Annexin-V by FACS analysis in response to **E)** upregulation or **F)** knockdown of *TCF7L2*, respectively (n=3; representative of 3 independent experiments). **G and H,** Densitometry of 3 independent Western blots as in Figure 3 F and H. Data are expressed as the ratio between either cleaved PARP or cleaved caspase-3 and its corresponding full length counterpart. **G)** Overexpression of *TCF7L2* combined with FasL treatment: PARP, P=0.0021; Capase3, P=0.0031. **H)** Downregulation of *TCF7L2* combined with FasL treatment: PARP, P<0.0001; Capase3, P=0.0009.

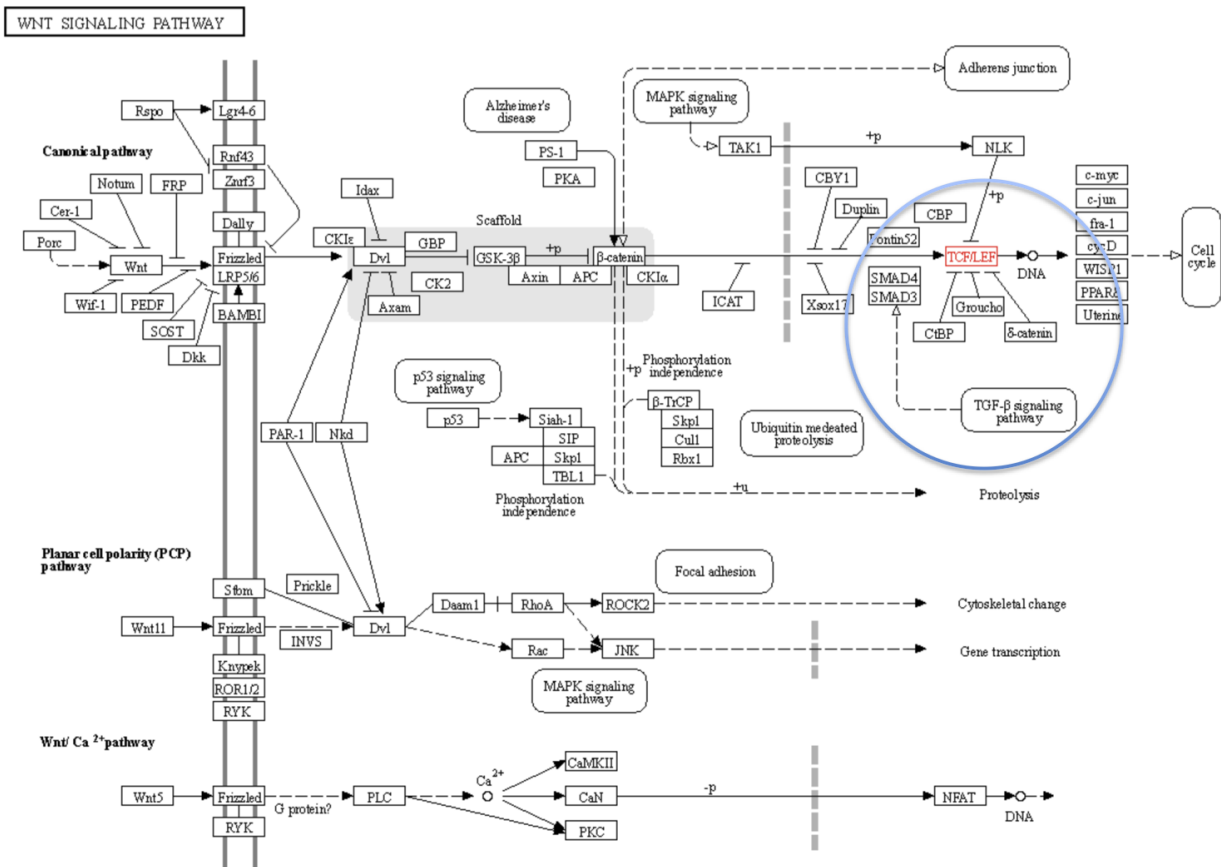

Figure S6: Wnt signaling pathway from KEGG.



**Table S1: Characteristics of discovery and replication cohorts**

| <b>CHIP+MGI</b>          | <b>Cases</b> | <b>Controls</b> |
|--------------------------|--------------|-----------------|
| Male                     | 71.3%        | 74%             |
| Median birth year        | 1948         | 1954            |
| Present or past smoking* | 10.2%        | 10%             |
| <b>UT**</b>              |              |                 |
| Male                     | 65.4%        | NA              |
| Median Age               | 65           | NA              |
| Present or past smoking  | 61.4%        | NA              |
| <b>MVP</b>               |              |                 |
| Male                     | 97.9%        | 90.6%           |
| Median age               | 73           | 69              |
| <b>HUNT</b>              |              |                 |
| Male                     | 64.4%        | 46.9%           |
| Median birth year        | 1942         | 1951            |
| Present or past smoking  | 64.4%        | 57.9%           |
| <b>UKBB</b>              |              |                 |
| Male                     | 68.1%        | 68.6%           |
| Median birth year        | 1945         | 1945            |
| Present or past smoking  | 67.7%        | 64.1%           |

\*Smoking information in MGI was obtained by ICD codes.

\*\*UT data was obtained from supplementary table 1 of LeMaire et al.

(<https://www.nature.com/articles/ng.934#MOESM20>)

**Table S2: Codes used for case-control selection in MVP cohort.****TAA CONTROLS**

**(cannot have any of the following codes, ever)**

- 441 Dissection of aorta, unspecified site
- 441.01 Dissection of aorta, thoracic
- 441.02 Dissection of aorta, abdominal
- 441.03 Dissection of aorta, thoracoabdominal
- 441.1 Thoracic aneurysm, ruptured
- 441.2 Thoracic aneurysm without mention of rupture
- 441.5 Aortic aneurysm of unspecified site, ruptured
- 441.6 Thoracoabdominal aneurysm, ruptured
- 441.7 Thoracoabdominal aneurysm, without mention of rupture
- 441.9 Aortic aneurysm of unspecified site without mention of rupture
- I71.00 Dissection of unspecified site of aorta
- I71.01 Dissection of thoracic aorta
- I71.02 Dissection of abdominal aorta
- I71.03 Dissection of thoracoabdominal aorta
- I71.1 Thoracic aortic aneurysm, ruptured

- I71.2 Thoracic aortic aneurysm, without rupture
- I71.5 Thoracoabdominal aortic aneurysm, ruptured
- I71.6 Thoracoabdominal aortic aneurysm, without rupture
- I71.8 Aortic aneurysm of unspecified site, ruptured
- I71.9 Aortic aneurysm of unspecified site, without rupture
- 746.4 Congenital insufficiency of aortic valve
- Q23.1 Congenital insufficiency of aortic valve

**controls cannot have any of the \*\_REPAIR codes (ASC\_REPAIR, ARCH\_REPEAR, DESC\_REPAIR, ANY\_REPAIR)**

**controls must also have 2 visits to the VA in each of the two years prior to MVP enrollment**

**ASC\_REPAIR (ascending)**

**defined as having any of the following CPT codes:**

- 33860 Ascending aortic replacement with valve resuspension when performed  
Ascending aorta graft, with cardiopulmonary bypass, with or without valve suspension;
- 33861 with coronary reconstruction
- 33858 Ascending aortic replacement with valve resuspension when performed (dissection)
- 33859 Ascending aortic replacement with valve resuspension when performed (non-dissection)
- 33863 Root replacement (Bentall)
- 33864 Valve sparing root reconstruction (David)
- 02QX0ZZ Repair Thoracic Aorta, Ascending/Arch, Open Approach
- 02QX3ZZ Repair Thoracic Aorta, Ascending/Arch, Percutaneous Approach
- 02QX4ZZ Repair Thoracic Aorta, Ascending/Arch, Percutaneous Endoscopic Approach  
Replacement of Thoracic Aorta, Ascending/Arch with Autologous Tissue Substitute,
- 02RX07Z Open Approach  
Replacement of Thoracic Aorta, Ascending/Arch with Zooplastic Tissue, Open
- 02RX08Z Approach  
Replacement of Thoracic Aorta, Ascending/Arch with Synthetic Substitute, Open
- 02RX0JZ Approach  
Replacement of Thoracic Aorta, Ascending/Arch with Nonautologous Tissue Substitute,
- 02RX0KZ Open Approach  
Replacement of Thoracic Aorta, Ascending/Arch with Autologous Tissue Substitute,
- 02RX47Z Percutaneous Endoscopic Approach  
Replacement of Thoracic Aorta, Ascending/Arch with Zooplastic Tissue, Percutaneous
- 02RX48Z Endoscopic Approach  
Replacement of Thoracic Aorta, Ascending/Arch with Synthetic Substitute,
- 02RX4JZ Percutaneous Endoscopic Approach  
Replacement of Thoracic Aorta, Ascending/Arch with Nonautologous Tissue Substitute,
- 02RX4KZ Percutaneous Endoscopic Approach

|         |                                                                                                                                               |
|---------|-----------------------------------------------------------------------------------------------------------------------------------------------|
| 02VX0DZ | Restriction of Thoracic Aorta, Ascending/Arch with Intraluminal Device, Open Approach                                                         |
| 02VX0EZ | Restriction of Thoracic Aorta, Ascending/Arch with Branched or Fenestrated Intraluminal Device, One or Two Arteries, Open Approach            |
| 02VX0FZ | Restriction of Thoracic Aorta, Ascending/Arch with Branched or Fenestrated Intraluminal Device, Three or More Arteries, Open Approach         |
| 02VX0ZZ | Restriction of Thoracic Aorta, Ascending/Arch, Open Approach                                                                                  |
| 02VX3DZ | Restriction of Thoracic Aorta, Ascending/Arch with Intraluminal Device, Percutaneous Approach                                                 |
| 02VX3EZ | Restriction of Thoracic Aorta, Ascending/Arch with Branched or Fenestrated Intraluminal Device, One or Two Arteries, Percutaneous Approach    |
| 02VX3FZ | Restriction of Thoracic Aorta, Ascending/Arch with Branched or Fenestrated Intraluminal Device, Three or More Arteries, Percutaneous Approach |
| 02VX3ZZ | Restriction of Thoracic Aorta, Ascending/Arch, Percutaneous Approach                                                                          |

### **ARCH\_REPAIR**

**defined as having any of the following CPT codes:**

- 33866 Hemiarch reconstruction
- 33871 Extended arch procedures (more than hemiarch)
- 33870 Transverse arch graft

### **DESC\_REPAIR (descending)**

**defined as having any of the following CPT codes:**

- 33877 Repair TAAA with graft, with or without bypass
- 33875 Repair TAA with graft, with or without bypass
- 33880 TEVAR (Zone 2)
- 33881 TEVAR (not Zone 2)
- 33877 Repair of thoracoabdominal aortic aneurysm with graft
- 02QW0ZZ Repair Thoracic Aorta, Descending, Open Approach
- 02QW3ZZ Repair Thoracic Aorta, Descending, Percutaneous Approach
- 02QW4ZZ Repair Thoracic Aorta, Descending, Percutaneous Endoscopic Approach
- 02RW07Z Replacement of Thoracic Aorta, Descending with Autologous Tissue Substitute, Open Approach
- 02RW08Z Replacement of Thoracic Aorta, Descending with Zooplastic Tissue, Open Approach
- 02RW0JZ Replacement of Thoracic Aorta, Descending with Synthetic Substitute, Open Approach
- 02RW0KZ Replacement of Thoracic Aorta, Descending with Nonautologous Tissue Substitute, Open Approach
- 02RW47Z Replacement of Thoracic Aorta, Descending with Autologous Tissue Substitute, Percutaneous Endoscopic Approach
- 02RW48Z Replacement of Thoracic Aorta, Descending with Zooplastic Tissue, Percutaneous Endoscopic Approach

|                                                                                                         |                                                                                                                                           |
|---------------------------------------------------------------------------------------------------------|-------------------------------------------------------------------------------------------------------------------------------------------|
| 02RW4JZ                                                                                                 | Replacement of Thoracic Aorta, Descending with Synthetic Substitute, Percutaneous Endoscopic Approach                                     |
| 02RW4KZ                                                                                                 | Replacement of Thoracic Aorta, Descending with Nonautologous Tissue Substitute, Percutaneous Endoscopic Approach                          |
| 02VW3DZ                                                                                                 | Restriction of Thoracic Aorta, Descending with Intraluminal Device, Percutaneous Approach                                                 |
| 02VW0DZ                                                                                                 | Restriction of Thoracic Aorta, Descending with Intraluminal Device, Open Approach                                                         |
| 02VW0EZ                                                                                                 | Restriction of Thoracic Aorta, Descending with Branched or Fenestrated Intraluminal Device, One or Two Arteries, Open Approach            |
| 02VW0FZ                                                                                                 | Restriction of Thoracic Aorta, Descending with Branched or Fenestrated Intraluminal Device, Three or More Arteries, Open Approach         |
| 02VW0ZZ                                                                                                 | Restriction of Thoracic Aorta, Descending, Open Approach                                                                                  |
| 02VW3EZ                                                                                                 | Restriction of Thoracic Aorta, Descending with Branched or Fenestrated Intraluminal Device, One or Two Arteries, Percutaneous Approach    |
| 02VW3FZ                                                                                                 | Restriction of Thoracic Aorta, Descending with Branched or Fenestrated Intraluminal Device, Three or More Arteries, Percutaneous Approach |
| 02VW3ZZ                                                                                                 | Restriction of Thoracic Aorta, Descending, Percutaneous Approach                                                                          |
| <b>ANY_REPAIR</b>                                                                                       |                                                                                                                                           |
| <b>defined as having ASC_REPAIR, ARCH_REPAIR, DESC_REPAIR, or having any of the of the codes below:</b> |                                                                                                                                           |
| 38.35                                                                                                   | Repair thoracic aorta                                                                                                                     |
| 38.45                                                                                                   | Resection thoracic aorta                                                                                                                  |
| 39.73                                                                                                   | TEVAR                                                                                                                                     |

**Table S3: Description of chromatin marks from ENCODE.**

| Mark                | ID          | Description of source                 |
|---------------------|-------------|---------------------------------------|
| DNase-seq           | ENCSR422IIZ | Ascending aorta of 51 year old female |
| DNase-seq           | ENCSR968TPO | Ascending aorta of 53 year old female |
| ChIP-seq of H3k27ac | ENCSR318HUC | Thoracic aorta of 54 year old male    |
| ChIP-seq of H3k27ac | ENCSR069UMW | Ascending aorta of 53 year old female |

**Table S4: Relationship of TAA index variant (rs4073288) with T2D independent variants in *TCF7L2* locus.**

| <b>T2D independent variants</b> | <b>LD R<sup>2</sup> with rs4073288</b> | <b>TAA p-value of rs4073288 after conditioning with T2D variant</b> |
|---------------------------------|----------------------------------------|---------------------------------------------------------------------|
| rs7903146                       | 0.2846                                 | 4.5×10 <sup>-4</sup>                                                |
| rs536643418                     | 0.0073                                 | 2.4×10 <sup>-8</sup>                                                |
| rs140242150                     | 0.0008                                 | 3.5×10 <sup>-8</sup>                                                |
| rs7918400                       | 0.08                                   | 3.1×10 <sup>-6</sup>                                                |
| rs184509201                     | 0.0004                                 | 3.8×10 <sup>-8</sup>                                                |
| rs180988137                     | 0.0132                                 | 6.1×10 <sup>-8</sup>                                                |
| rs78025551                      | 0.2468                                 | 4.5×10 <sup>-5</sup>                                                |
| rs34855922                      | 0.0203                                 | 3.9×10 <sup>-8</sup>                                                |

**Table S5: Description of RegulomeDB ranks and associated variant count in 95% credible set of *TCF7L2* locus.**

| <b>RegulomeDB rank</b> | <b>Description</b>                  | <b>Variant count</b> |
|------------------------|-------------------------------------|----------------------|
| 3a                     | TF binding + any motif + DNase peak | 2                    |
| 4                      | TF binding + DNase peak             | 4                    |
| 5                      | TF binding or DNase peak            | 12                   |
| 6                      | Motif hit                           | 5                    |
| 7                      | Others                              | 9                    |

**Table S6: Genetic correlation between TAA and other traits as measured by LDSC.**

| <b>Trait</b>       | <b><math>r_g</math></b> | <b>S.E.</b> | <b>P</b> | <b>Source/PMID</b> |
|--------------------|-------------------------|-------------|----------|--------------------|
| SBP                | -0.0069                 | 0.0813      | 0.9327   | UKBB               |
| DBP                | 0.2713                  | 0.0916      | 0.0031   | UKBB               |
| Smoking Initiation | 0.1966                  | 0.1902      | 0.3011   | 30617275           |
| Cig. Per day       | 0.211                   | 0.1586      | 0.1833   | 30617275           |
| Total cholesterol  | 0.0314                  | 0.1286      | 0.8072   | 20686565           |
| HDL                | -0.0905                 | 0.1336      | 0.4983   | 20686565           |
| LDL                | 0.0271                  | 0.1565      | 0.8623   | 20686565           |
| Triglyceride       | 0.2149                  | 0.1197      | 0.0725   | 20686565           |
| CAD                | 0.1749                  | 0.108       | 0.1054   | 26343387           |
| T2D                | 0.006                   | 0.147       | 0.963    | 22885922           |
| Height             | 0.3286                  | 0.1139      | 0.0039   | 20881960           |

**Table S7: Primers used for qPCR.**

| Gene   | Sequence: 5' to 3'              |
|--------|---------------------------------|
| BCL2   | Forward:TCATGTGTGTGGAGAGCGTC    |
|        | Reverse:GCCGTACAGTTCCACAAAGG    |
| BAX    | Forward:CCCGAGAGGTCTTTTCCGAG    |
|        | Reverse:CCAGCCCATGATGGTTCTGAT   |
| TCF7L2 | Forward:GAATCGTCCCAGAGTGATGTC   |
|        | Reverse:ACGACCTTTGCTCTCATTTCC   |
| ACTB   | Forward:GCTATCACCTCCCCTGTGTG    |
|        | Reverse:GTCATTCCAAATATGAGATGCGT |

**Table S8: Effect-size variation within discovery cohort.**

| <i>TCF7L2</i> (rs7904519)                      |                   |                      |                    |                       |      |           |                      |
|------------------------------------------------|-------------------|----------------------|--------------------|-----------------------|------|-----------|----------------------|
|                                                | N <sub>case</sub> | N <sub>control</sub> | AF <sub>case</sub> | AF <sub>control</sub> | OR   | 95% CI    | Chi-square P         |
| CHIP <sub>cases</sub> /MGI <sub>controls</sub> | 956               | 18295                | 0.414              | 0.473                 | 0.78 | 0.71-0.86 | 3.6×10 <sup>-7</sup> |
| MGI <sub>cases</sub> /MGI <sub>controls</sub>  | 395               | 18295                | 0.434              | 0.473                 | 0.84 | 0.73-0.97 | 0.02                 |
| CHIP <sub>AA</sub> /MGI <sub>controls</sub>    | 773               | 18295                | 0.416              | 0.473                 | 0.79 | 0.71-0.87 | 9.7×10 <sup>-6</sup> |
| CHIP <sub>DA</sub> /MGI <sub>controls</sub>    | 83                | 18295                | 0.349              | 0.473                 | 0.59 | 0.43-0.82 | 0.001                |
| <i>FBNI</i> (rs16961065)                       |                   |                      |                    |                       |      |           |                      |
|                                                | N <sub>case</sub> | N <sub>control</sub> | AF <sub>case</sub> | AF <sub>control</sub> | OR   | 95% CI    | Chi-square P         |
| CHIP <sub>cases</sub> /MGI <sub>controls</sub> | 956               | 18295                | 0.142              | 0.10                  | 1.48 | 1.29-1.69 | 4.1×10 <sup>-9</sup> |
| MGI <sub>cases</sub> /MGI <sub>controls</sub>  | 395               | 18295                | 0.124              | 0.10                  | 1.27 | 1.02-1.57 | 0.02                 |
| CHIP <sub>AA</sub> /MGI <sub>controls</sub>    | 773               | 18295                | 0.142              | 0.10                  | 1.48 | 1.27-1.71 | 1.1×10 <sup>-7</sup> |
| CHIP <sub>DA</sub> /MGI <sub>controls</sub>    | 83                | 18295                | 0.114              | 0.10                  | 1.17 | 0.70-1.84 | 0.53                 |

CHIP<sub>AA</sub>: ascending thoracic aneurysm in CHIP; CHIP<sub>DA</sub>: descending thoracic aneurysm in CHIP

**Table S9: Effect-size variation by phenotype definition within MVP cohort.**

|                                | EA | TAA<br>N <sub>case</sub> =6554 |      |               |                      | Any Thoracic Aortic Repair<br>N <sub>case</sub> =730 |      |               |                       | Ascending + Arch Repair<br>N <sub>case</sub> =444 |      |               |                       |
|--------------------------------|----|--------------------------------|------|---------------|----------------------|------------------------------------------------------|------|---------------|-----------------------|---------------------------------------------------|------|---------------|-----------------------|
|                                |    | Beta                           | SE   | OR<br>95% CI  | P                    | Beta                                                 | SE   | OR<br>95% CI  | P                     | Beta                                              | SE   | OR<br>95% CI  | P                     |
| rs4073288<br>( <i>TCF7L2</i> ) | A  | -0.06                          | 0.02 | 0.90-<br>0.98 | 3.6×10 <sup>-3</sup> | -0.11                                                | 0.06 | 0.8-1         | 0.05                  | -0.11                                             | 0.07 | 0.78-<br>1.03 | 0.14                  |
| rs7904519<br>( <i>TCF7L2</i> ) | G  | -0.06                          | 0.02 | 0.90-<br>0.98 | 4×10 <sup>-4</sup>   | -0.12                                                | 0.05 | 0.8-<br>0.98  | 0.03                  | -0.13                                             | 0.07 | 0.76-1        | 0.06                  |
| rs4074718<br>( <i>TCF7L2</i> ) | A  | -0.06                          | 0.02 | 0.90-<br>0.98 | 8×10 <sup>-4</sup>   | -0.15                                                | 0.06 | 0.76-<br>0.97 | 9×10 <sup>-3</sup>    | -0.15                                             | 0.07 | 0.75-<br>0.99 | 0.04                  |
| Rs591519<br>( <i>FBNI</i> )    | T  | 0.24                           | 0.03 | 1.20-<br>1.35 | 9×10 <sup>-20</sup>  | 0.48                                                 | 0.07 | 1.41-<br>1.85 | 1.4×10 <sup>-10</sup> | 0.57                                              | 0.09 | 1.48-<br>2.11 | 4.6×10 <sup>-10</sup> |

N<sub>control</sub>=329971 for all comparisons



**VA Million Veteran Program: Core Acknowledgement for Publications**  
**Updated December 10, 2020**

**MVP Executive Committee**

- Co-Chair: J. Michael Gaziano, M.D., M.P.H.  
VA Boston Healthcare System, 150 S. Huntington Avenue, Boston, MA 02130
- Co-Chair: Sumitra Muralidhar, Ph.D.  
US Department of Veterans Affairs, 810 Vermont Avenue NW, Washington, DC 20420
- Rachel Ramoni, D.M.D., Sc.D., Chief VA Research and Development Officer  
US Department of Veterans Affairs, 810 Vermont Avenue NW, Washington, DC 20420
- Jean Beckham, Ph.D.  
Durham VA Medical Center, 508 Fulton Street, Durham, NC 27705
- Kyong-Mi Chang, M.D.  
Philadelphia VA Medical Center, 3900 Woodland Avenue, Philadelphia, PA 19104
- Christopher J. O'Donnell, M.D., M.P.H.  
VA Boston Healthcare System, 150 S. Huntington Avenue, Boston, MA 02130
- Philip S. Tsao, Ph.D.  
VA Palo Alto Health Care System, 3801 Miranda Avenue, Palo Alto, CA 94304
- James Breeling, M.D., Ex-Officio  
US Department of Veterans Affairs, 810 Vermont Avenue NW, Washington, DC 20420
- Grant Huang, Ph.D., Ex-Officio  
US Department of Veterans Affairs, 810 Vermont Avenue NW, Washington, DC 20420
- Juan P. Casas, M.D., Ph.D., Ex-Officio  
VA Boston Healthcare System, 150 S. Huntington Avenue, Boston, MA 02130

**MVP Program Office**

- Sumitra Muralidhar, Ph.D.  
US Department of Veterans Affairs, 810 Vermont Avenue NW, Washington, DC 20420
- Jennifer Moser, Ph.D.  
US Department of Veterans Affairs, 810 Vermont Avenue NW, Washington, DC 20420

**MVP Recruitment/Enrollment**

- Recruitment/Enrollment Director/Deputy Director, Boston – Stacey B. Whitbourne, Ph.D.; Jessica V. Brewer, M.P.H.  
VA Boston Healthcare System, 150 S. Huntington Avenue, Boston, MA 02130
- MVP Coordinating Centers
  - o Clinical Epidemiology Research Center (CERC), West Haven – Mihaela Aslan, Ph.D.  
West Haven VA Medical Center, 950 Campbell Avenue, West Haven, CT 06516

- Cooperative Studies Program Clinical Research Pharmacy Coordinating Center, Albuquerque – Todd Connor, Pharm.D.; Dean P. Argyres, B.S., M.S.  
New Mexico VA Health Care System, 1501 San Pedro Drive SE, Albuquerque, NM 87108
- Genomics Coordinating Center, Palo Alto – Philip S. Tsao, Ph.D.  
VA Palo Alto Health Care System, 3801 Miranda Avenue, Palo Alto, CA 94304
- MVP Boston Coordinating Center, Boston - J. Michael Gaziano, M.D., M.P.H.  
VA Boston Healthcare System, 150 S. Huntington Avenue, Boston, MA 02130
- MVP Information Center, Canandaigua – Brady Stephens, M.S.  
Canandaigua VA Medical Center, 400 Fort Hill Avenue, Canandaigua, NY 14424
- VA Central Biorepository, Boston – Mary T. Brophy M.D., M.P.H.; Donald E. Humphries, Ph.D.; Luis E. Selva, Ph.D.  
VA Boston Healthcare System, 150 S. Huntington Avenue, Boston, MA 02130
- MVP Informatics, Boston – Nhan Do, M.D.; Shahpoor (Alex) Shayan, M.S.  
VA Boston Healthcare System, 150 S. Huntington Avenue, Boston, MA 02130
- MVP Data Operations/Analytics, Boston – Kelly Cho, M.P.H., Ph.D.  
VA Boston Healthcare System, 150 S. Huntington Avenue, Boston, MA 02130
- Director of Regulatory Affairs – Lori Churby, B.S.  
VA Palo Alto Health Care System, 3801 Miranda Avenue, Palo Alto, CA 94304

### **MVP Science**

- Science Operations – Christopher J. O’Donnell, M.D., M.P.H.  
VA Boston Healthcare System, 150 S. Huntington Avenue, Boston, MA 02130
- Genomics Core – Christopher J. O’Donnell, M.D., M.P.H.; Saiju Pyarajan Ph.D.  
VA Boston Healthcare System, 150 S. Huntington Avenue, Boston, MA 02130  
Philip S. Tsao, Ph.D.  
VA Palo Alto Health Care System, 3801 Miranda Avenue, Palo Alto, CA 94304
- Data Core – Kelly Cho, M.P.H, Ph.D.  
VA Boston Healthcare System, 150 S. Huntington Avenue, Boston, MA 02130
- VA Informatics and Computing Infrastructure (VINCI) – Scott L. DuVall, Ph.D.  
VA Salt Lake City Health Care System, 500 Foothill Drive, Salt Lake City, UT 84148
- Data and Computational Sciences – Saiju Pyarajan, Ph.D.  
VA Boston Healthcare System, 150 S. Huntington Avenue, Boston, MA 02130
- Statistical Genetics – Elizabeth Hauser, Ph.D.  
Durham VA Medical Center, 508 Fulton Street, Durham, NC 27705  
Yan Sun, Ph.D.  
Atlanta VA Medical Center, 1670 Clairmont Road, Decatur, GA 30033  
Hongyu Zhao, Ph.D.  
West Haven VA Medical Center, 950 Campbell Avenue, West Haven, CT 06516

### **Current MVP Local Site Investigators**

- Atlanta VA Medical Center (Peter Wilson, M.D.)  
1670 Clairmont Road, Decatur, GA 30033
- Bay Pines VA Healthcare System (Rachel McArdle, Ph.D.)  
10,000 Bay Pines Blvd Bay Pines, FL 33744
- Birmingham VA Medical Center (Louis Dellitalia, M.D.)  
700 S. 19th Street, Birmingham AL 35233
- Central Western Massachusetts Healthcare System (Kristin Mattocks, Ph.D., M.P.H.)  
421 North Main Street, Leeds, MA 01053
- Cincinnati VA Medical Center (John Harley, M.D., Ph.D.)  
3200 Vine Street, Cincinnati, OH 45220
- Clement J. Zablocki VA Medical Center (Jeffrey Whittle, M.D., M.P.H.)  
5000 West National Avenue, Milwaukee, WI 53295
- VA Northeast Ohio Healthcare System (Frank Jacono, M.D.)  
10701 East Boulevard, Cleveland, OH 44106
- Durham VA Medical Center (Jean Beckham, Ph.D.)  
508 Fulton Street, Durham, NC 27705
- Edith Nourse Rogers Memorial Veterans Hospital (John Wells., Ph.D.)  
200 Springs Road, Bedford, MA 01730
- Edward Hines, Jr. VA Medical Center (Salvador Gutierrez, M.D.)  
5000 South 5th Avenue, Hines, IL 60141
- Veterans Health Care System of the Ozarks (Gretchen Gibson, D.D.S., M.P.H.)  
1100 North College Avenue, Fayetteville, AR 72703
- Fargo VA Health Care System (Kimberly Hammer, Ph.D.)  
2101 N. Elm, Fargo, ND 58102
- VA Health Care Upstate New York (Laurence Kaminsky, Ph.D.)  
113 Holland Avenue, Albany, NY 12208
- New Mexico VA Health Care System (Gerardo Villareal, M.D.)  
1501 San Pedro Drive, S.E. Albuquerque, NM 87108
- VA Boston Healthcare System (Scott Kinlay, M.B.B.S., Ph.D.)  
150 S. Huntington Avenue, Boston, MA 02130
- VA Western New York Healthcare System (Junzhe Xu, M.D.)  
3495 Bailey Avenue, Buffalo, NY 14215-1199
- Ralph H. Johnson VA Medical Center (Mark Hamner, M.D.)  
109 Bee Street, Mental Health Research, Charleston, SC 29401
- Columbia VA Health Care System (Roy Mathew, M.D.)  
6439 Garners Ferry Road, Columbia, SC 29209
- VA North Texas Health Care System (Sujata Bhushan, M.D.)  
4500 S. Lancaster Road, Dallas, TX 75216
- Hampton VA Medical Center (Pran Iruvanti, D.O., Ph.D.)  
100 Emancipation Drive, Hampton, VA 23667

- Richmond VA Medical Center (Michael Godschalk, M.D.)  
1201 Broad Rock Blvd., Richmond, VA 23249
- Iowa City VA Health Care System (Zuhair Ballas, M.D.)  
601 Highway 6 West, Iowa City, IA 52246-2208
- Eastern Oklahoma VA Health Care System (Douglas Ivins, M.D.)  
1011 Honor Heights Drive, Muskogee, OK 74401
- James A. Haley Veterans' Hospital (Stephen Mastorides, M.D.)  
13000 Bruce B. Downs Blvd, Tampa, FL 33612
- James H. Quillen VA Medical Center (Jonathan Moorman, M.D., Ph.D.)  
Corner of Lamont & Veterans Way, Mountain Home, TN 37684
- John D. Dingell VA Medical Center (Saib Gappy, M.D.)  
4646 John R Street, Detroit, MI 48201
- Louisville VA Medical Center (Jon Klein, M.D., Ph.D.)  
800 Zorn Avenue, Louisville, KY 40206
- Manchester VA Medical Center (Nora Ratcliffe, M.D.)  
718 Smyth Road, Manchester, NH 03104
- Miami VA Health Care System (Hermes Florez, M.D., Ph.D.)  
1201 NW 16th Street, 11 GRC, Miami FL 33125
- Michael E. DeBakey VA Medical Center (Olaoluwa Okusaga, M.D.)  
2002 Holcombe Blvd, Houston, TX 77030
- Minneapolis VA Health Care System (Maureen Murdoch, M.D., M.P.H.)  
One Veterans Drive, Minneapolis, MN 55417
- N. FL/S. GA Veterans Health System (Peruvemba Sriram, M.D.)  
1601 SW Archer Road, Gainesville, FL 32608
- Northport VA Medical Center (Shing Shing Yeh, Ph.D., M.D.)  
79 Middleville Road, Northport, NY 11768
- Overton Brooks VA Medical Center (Neeraj Tandon, M.D.)  
510 East Stoner Ave, Shreveport, LA 71101
- Philadelphia VA Medical Center (Darshana Jhala, M.D.)  
3900 Woodland Avenue, Philadelphia, PA 19104
- Phoenix VA Health Care System (Samuel Aguayo, M.D.)  
650 E. Indian School Road, Phoenix, AZ 85012
- Portland VA Medical Center (David Cohen, M.D.)  
3710 SW U.S. Veterans Hospital Road, Portland, OR 97239
- Providence VA Medical Center (Satish Sharma, M.D.)  
830 Chalkstone Avenue, Providence, RI 02908
- Richard Roudebush VA Medical Center (Suthat Liangpunsakul, M.D., M.P.H.)  
1481 West 10th Street, Indianapolis, IN 46202
- Salem VA Medical Center (Kris Ann Oursler, M.D.)  
1970 Roanoke Blvd, Salem, VA 24153

- San Francisco VA Health Care System (Mary Whooley, M.D.)  
4150 Clement Street, San Francisco, CA 94121
- South Texas Veterans Health Care System (Sunil Ahuja, M.D.)  
7400 Merton Minter Boulevard, San Antonio, TX 78229
- Southeast Louisiana Veterans Health Care System (Joseph Constans, Ph.D.)  
2400 Canal Street, New Orleans, LA 70119
- Southern Arizona VA Health Care System (Paul Meyer, M.D., Ph.D.)  
3601 S 6th Avenue, Tucson, AZ 85723
- Sioux Falls VA Health Care System (Jennifer Greco, M.D.)  
2501 W 22nd Street, Sioux Falls, SD 57105
- St. Louis VA Health Care System (Michael Rauchman, M.D.)  
915 North Grand Blvd, St. Louis, MO 63106
- Syracuse VA Medical Center (Richard Servatius, Ph.D.)  
800 Irving Avenue, Syracuse, NY 13210
- VA Eastern Kansas Health Care System (Melinda Gaddy, Ph.D.)  
4101 S 4th Street Trafficway, Leavenworth, KS 66048
- VA Greater Los Angeles Health Care System (Agnes Wallbom, M.D., M.S.)  
11301 Wilshire Blvd, Los Angeles, CA 90073
- VA Long Beach Healthcare System (Timothy Morgan, M.D.)  
5901 East 7th Street Long Beach, CA 90822
- VA Maine Healthcare System (Todd Stapley, D.O.)  
1 VA Center, Augusta, ME 04330
- VA New York Harbor Healthcare System (Scott Sherman, M.D., M.P.H.)  
423 East 23rd Street, New York, NY 10010
- VA Pacific Islands Health Care System (George Ross, M.D.)  
459 Patterson Rd, Honolulu, HI 96819
- VA Palo Alto Health Care System (Philip Tsao, Ph.D.)  
3801 Miranda Avenue, Palo Alto, CA 94304-1290
- VA Pittsburgh Health Care System (Patrick Strollo, Jr., M.D.)  
University Drive, Pittsburgh, PA 15240
- VA Puget Sound Health Care System (Edward Boyko, M.D.)  
1660 S. Columbian Way, Seattle, WA 98108-1597
- VA Salt Lake City Health Care System (Laurence Meyer, M.D., Ph.D.)  
500 Foothill Drive, Salt Lake City, UT 84148
- VA San Diego Healthcare System (Samir Gupta, M.D., M.S.C.S.)  
3350 La Jolla Village Drive, San Diego, CA 92161
- VA Sierra Nevada Health Care System (Mostaqul Huq, Pharm.D., Ph.D.)  
975 Kirman Avenue, Reno, NV 89502
- VA Southern Nevada Healthcare System (Joseph Fayad, M.D.)  
6900 North Pecos Road, North Las Vegas, NV 89086

- VA Tennessee Valley Healthcare System (Adriana Hung, M.D., M.P.H.)  
1310 24th Avenue, South Nashville, TN 37212
- Washington DC VA Medical Center (Jack Lichy, M.D., Ph.D.)  
50 Irving St, Washington, D. C. 20422
- W.G. (Bill) Hefner VA Medical Center (Robin Hurley, M.D.)  
1601 Brenner Ave, Salisbury, NC 28144
- White River Junction VA Medical Center (Brooks Robey, M.D.)  
163 Veterans Drive, White River Junction, VT 05009
- William S. Middleton Memorial Veterans Hospital (Robert Striker, M.D., Ph.D.)  
2500 Overlook Terrace, Madison, WI 53705
